# Supplementary material for: Immunosensing system for α-fetoprotein through boronate immunoaffinity column in combination with flow injection chemiluminescence
Source: Royal Society of Chemistry journal article supplement (doi:10.1039/b812642a), 2008-10-22

## Supporting Information

SFig. 1 The CL intensity of 0.5 mM luminol + 4 mM H<sub>2</sub>O<sub>2</sub> + 0.5 mM PIP at AFP concentration of 500 ng/mL after regeneration of the immunoaffinity column by 10 mM NaOH.

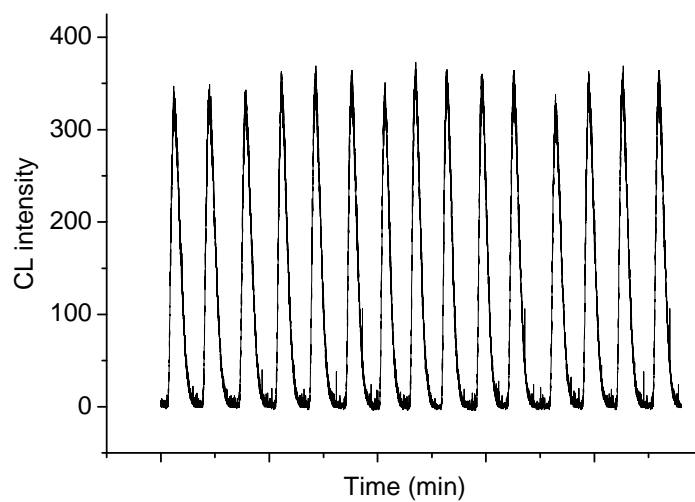

**SFig. 2** Effect of flow rate of pre-incubation immunomixture through the immunoaffinity column on the CL intensity. Pre-incubation time of 80 ng/mL AFP with enzyme tracer was 30 min

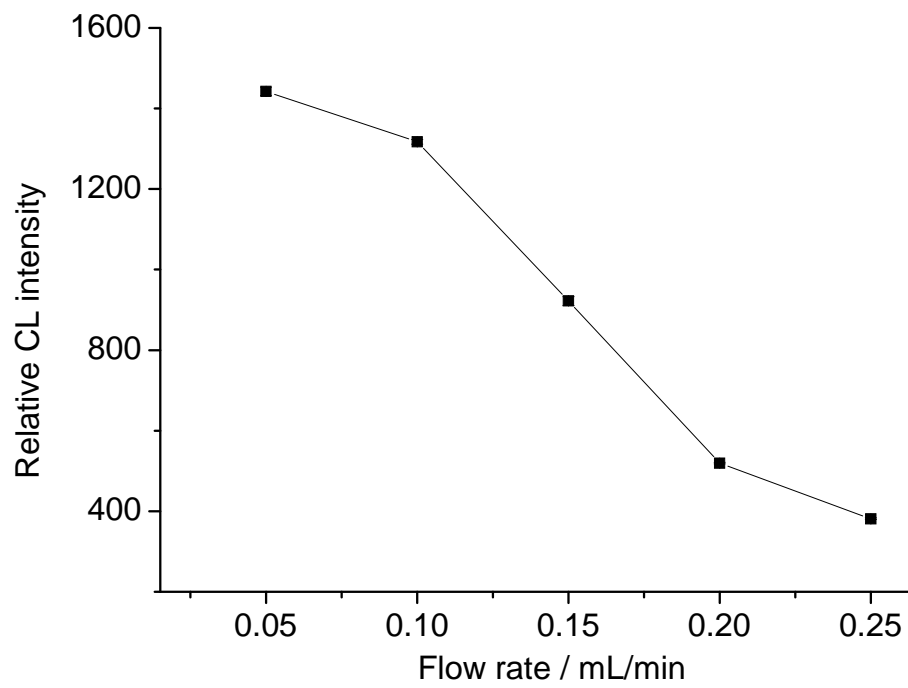

**SFig. 3** Reproducibility of the immunoaffinity reactor with 0.5 mM luminol + 4 mM  $H_2O_2$  + 0.5 mM PIP at AFP concentration of 300 ng/mL.

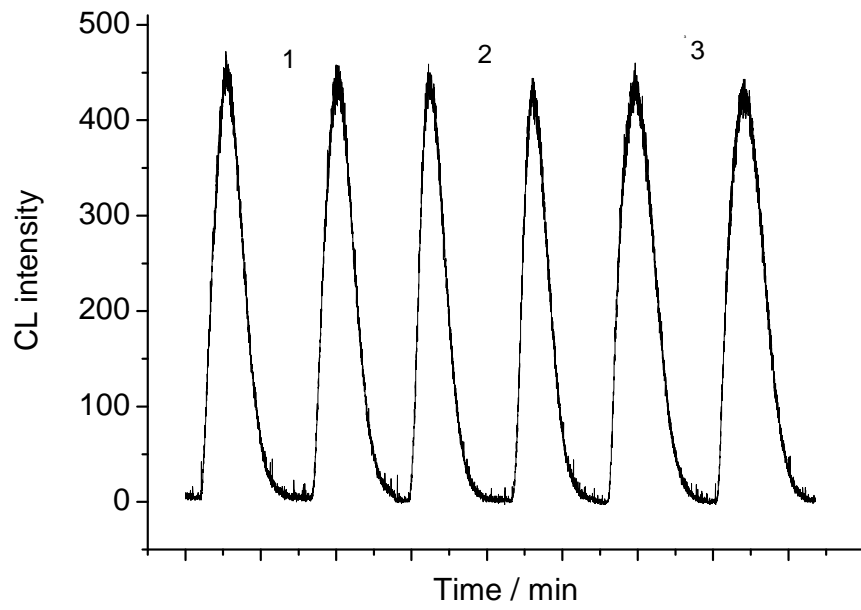

Supplement: b812642a.pdf [file b812642a.pdf]
